# Supplementary material for: Bioisosteric replacement of the pyrazole 3-carboxamide moiety of rimonabant. A novel series of oxadiazoles as CB1 cannabinoid receptor antagonists
Source: Royal Society of Chemistry journal article supplement (doi:10.1039/b807648k), 2008-01-01
Supplement: b807648k.pdf [file b807648k.pdf]

## Electronic Supplementary Information (ESI)

### Title:

Bioisosteric Replacement of the Pyrazole 3-Carboxamide Moiety of Rimonabant. A Novel Series of Oxadiazoles as CB1 Cannabinoid Receptor Antagonists

### Author:

Cheng-Ming Chu, Ming-Shiu Hung, Min-Tsang Hsieh, Chun-Wei Kuo, Suja T. D., Jen-Shin Song, Hua-Hao Chiu, Yu-Sheng Chao and Kak-Shan Shia\*

Division of Biotechnology and Pharmaceutical Research, National Health Research Institutes, Miaoli County 350, Taiwan, R.O.C. *E-mail:* [ksshia@nhri.org.tw](mailto:ksshia@nhri.org.tw)

\*To whom correspondence should be addressed.

### Contents of ESI:

- 1).Table 2: A list of  $K_i$  values of all compounds, including **4a-k**, **8a-h**, and **SR141716A**, toward CB1 and CB2 receptors

**Table 2** Biological evaluation of 3-alkyloxadiazoles and 5-alkyloxadiazoles on hCB1 and hCB2 receptors (Ki)

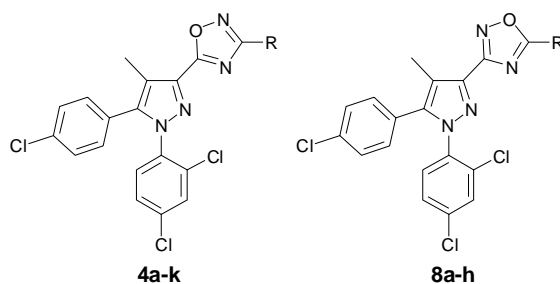

| Compd            | R                                                               | hCB1 <sup>a, b</sup><br>Ki(nM) | hCB2 <sup>a, b</sup><br>Ki(nM) |
|------------------|-----------------------------------------------------------------|--------------------------------|--------------------------------|
| <b>4a</b>        | CH <sub>3</sub>                                                 | 271.3 ± 5.9                    | >5000                          |
| <b>4b</b>        | CH <sub>2</sub> CH <sub>3</sub>                                 | 119.8 ± 23.9                   | 2713.5 ± 212.6                 |
| <b>4c</b>        | CH <sub>2</sub> CH <sub>2</sub> CH <sub>3</sub>                 | 155.0 ± 46.6                   | 3134.9 ± 436.6                 |
| <b>4d</b>        | CH <sub>2</sub> (CH <sub>2</sub> ) <sub>2</sub> CH <sub>3</sub> | 136.2 ± 7.3                    | >5000                          |
| <b>4e</b>        | CH <sub>2</sub> (CH <sub>2</sub> ) <sub>3</sub> CH <sub>3</sub> | 117.5 ± 14.9                   | >5000                          |
| <b>4f</b>        | CH(CH <sub>3</sub> ) <sub>2</sub>                               | 42.7 ± 10.4                    | 2887.5 ± 302.3                 |
| <b>4g</b>        | CH(C <sub>2</sub> H <sub>5</sub> ) <sub>2</sub>                 | 33.1 ± 7.8                     | 1455.6 ± 531.2                 |
| <b>4h</b>        | C(CH <sub>3</sub> ) <sub>3</sub>                                | 34.4 ± 4.6                     | 2167.7 ± 39.8                  |
| <b>4i</b>        | <i>c</i> -C <sub>3</sub> H <sub>5</sub>                         | 61.0 ± 5.0                     | 2833.2 ± 51.0                  |
| <b>4j</b>        | CH <sub>2</sub> CH(CH <sub>3</sub> ) <sub>2</sub>               | 161.9 ± 4.9                    | 3839.1 ± 377.6                 |
| <b>4k</b>        | CH <sub>2</sub> ( <i>c</i> -C <sub>3</sub> H <sub>5</sub> )     | 231.7 ± 108.7                  | 4139.2 ± 343.9                 |
| <b>8a</b>        | CH <sub>3</sub>                                                 | 492.4 ± 56.3                   | >5000                          |
| <b>8b</b>        | CH <sub>2</sub> CH <sub>3</sub>                                 | 144.1 ± 25.3                   | >5000                          |
| <b>8c</b>        | CH <sub>2</sub> CH <sub>2</sub> CH <sub>3</sub>                 | 85.3 ± 21.8                    | 4155.4 ± 166.1                 |
| <b>8d</b>        | CH(CH <sub>3</sub> ) <sub>2</sub>                               | 41.4 ± 12.8                    | 3761.8 ± 549.1                 |
| <b>8e</b>        | CH(C <sub>2</sub> H <sub>5</sub> ) <sub>2</sub>                 | 29.3 ± 9.4                     | 554.4 ± 70.2                   |
| <b>8f</b>        | C(CH <sub>3</sub> ) <sub>3</sub>                                | 16.2 ± 4.6                     | 4082.5 ± 112.0                 |
| <b>8g</b>        | CF <sub>3</sub>                                                 | 19.8 ± 2.7                     | >5000                          |
| <b>8h</b>        | C(CH <sub>3</sub> ) <sub>2</sub> CF <sub>3</sub>                | 7.6 ± 2.1                      | 1478.0 ± 573.1                 |
| <b>SR141716A</b> |                                                                 | 7.6 ± 0.5                      | 685.4 ± 44.6                   |

<sup>a</sup>Data are expressed as the mean ± SD of at least three independent experiments.

<sup>b</sup>Binding affinity determined by inhibition of [<sup>3</sup>H]-CP55940 binding to the membrane of hCB1 or hCB2-expressing HEK 293 cells is expressed as Ki.
